# Supplementary material for: Directing Uphill Strand Displacement with an Engineered Superhelicase
Source: PubMed Central journal article supplement (PMC10661026; doi:10.1021/acssynbio.3c00452), 2023-10-16
Supplement: sb3c00452_si_001.pdf [file sb3c00452_si_001.pdf]

# Supplementary Information

## Directing Uphill Strand Displacement with an Engineered Super-Helicase

Helena Hall-Thomsen<sup>1</sup>, Shavier Small<sup>1</sup>, Momcilo Gavrilov<sup>2</sup>, Taekjip Ha<sup>2,3,4</sup>, Rebecca Schulman<sup>1,5,6,\*</sup>, Pepijn Gerben Moerman<sup>1,7,\*</sup>

<sup>1</sup>Chemical & Biomolecular Engineering, Johns Hopkins University, Baltimore, MD 21218, USA

<sup>2</sup>Biophysics and Biophysical Chemistry, Johns Hopkins University, Baltimore, MD 21218, USA

<sup>3</sup>Biomedical Engineering, Johns Hopkins University, Baltimore, MD 21218, USA

<sup>4</sup>Howard Hughes Medical Institute, Chevy Chase, MD 20815, USA

<sup>5</sup>Computer Science, Johns Hopkins University, Baltimore, MD 21218, USA

<sup>6</sup>Chemistry, Johns Hopkins University, Baltimore 21218, MD, USA

<sup>7</sup>Chemical Engineering and Chemistry, Eindhoven University of Technology, Eindhoven, Netherlands

\*Correspondence: [rschulm3@jhu.edu](mailto:rschulm3@jhu.edu), [p.g.moerman@tue.nl](mailto:p.g.moerman@tue.nl)

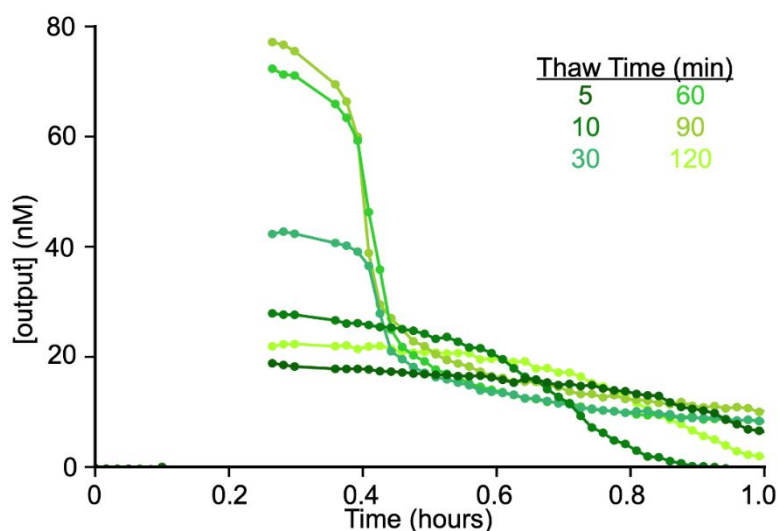

**Figure S1.** Amount of output released from initial complex varied over different thawing times of Rep-X. We thawed Rep-X at room temperature directly from the  $-20^{\circ}\text{C}$  freezer for 5, 10, 30, 60, 90, and 120 minutes. Each sample contained 100 nM of R1:output\_1, 100 nM Rep-X, and 1 mM ATP. We observed the highest Rep-X unwinding rate or efficiency at 90 minutes with an unwound fraction of  $\sim 75\%$ . From these results, we decided to follow a 60 to 90 minute room temperature thawing Rep-X protocol for each of the three DNA systems.

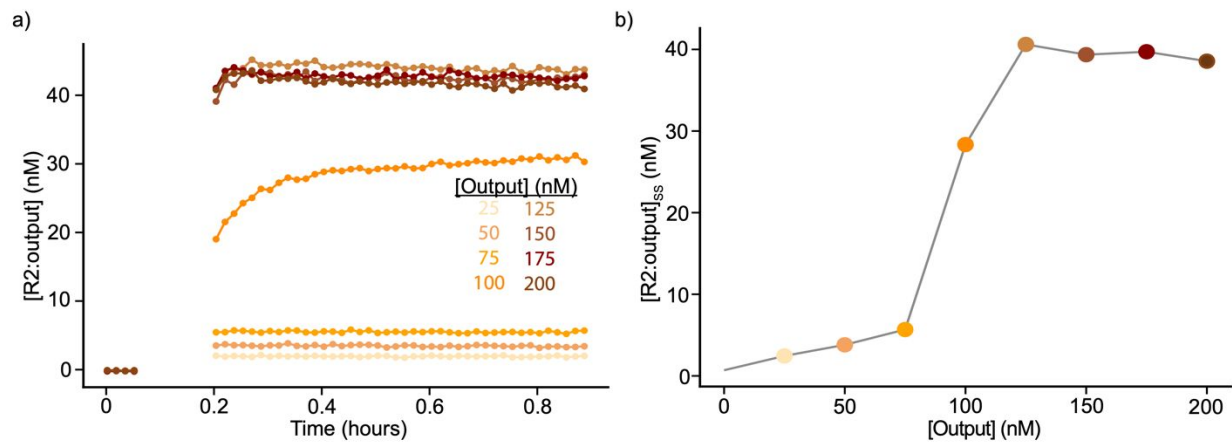

**Figure S2.** **a)** Proportion of R2:output\_2 complexes formed using different concentrations of output\_2. With 100 nM of reporter, 1 mM of ATP and varying free, single-stranded output\_2 concentrations of 25, 50, 75, 100, 125, 150, 175, and 200 nM, the amount of reporter displaced by output\_2 plateaus at ~45% with 125 nM of output\_2. **b)** Average amount of R2:output\_2 complexes formed with varying concentrations of output.

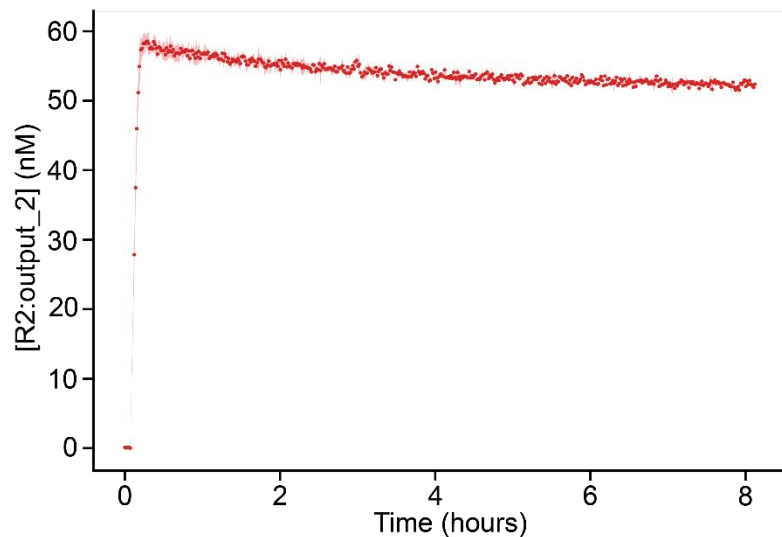

**Figure S3.** Evaluating the effectiveness of the reporting scheme as measure of "lock-key" reaction dynamics. With 400 nM of free, single-stranded output\_2 and 100 nM of reporter, ~60% of available reporter was unwound by the hybridization of output\_2 to R2. Red shading represents standard deviation of the duplicate samples, however, there is not enough deviation between the duplicates to be easily visible.

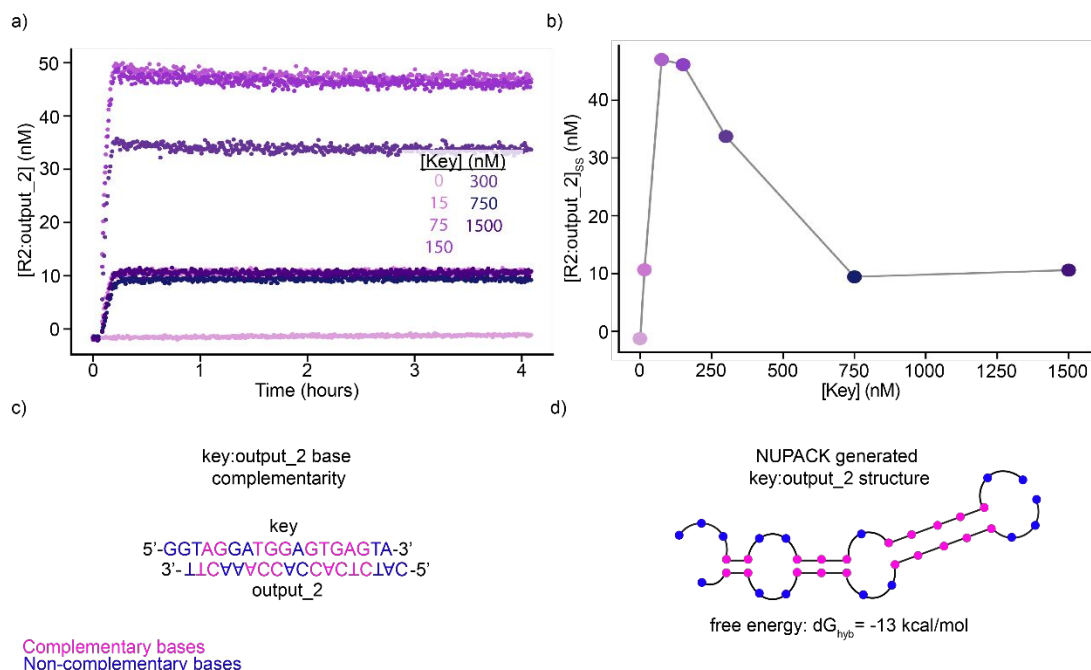

**Figure S4.** **a)** Concentrations of reporter complex formed using increasing concentrations of key on “locked” foundation:output\_2n. 100 nM Rep-X, 100 nM of reporter, and 1 mM ATP were present in each experiment. 150 nM of lock was annealed with 100 nM foundation:output\_2n for each sample. The samples included 0, 15, 75, 150, 300, 750, and 1500 nM key as labeled. As the concentration of key is increased to 75 or 150 nM, large concentrations of R2:output\_2 complexes are produced. A decrease in R2:output\_2 is observed once the amount of key exceeds a 1:1 ratio of lock:key. **b)** Average concentrations of R2:output\_2 complexes formed using different concentrations of key after the experiments in (a). **c)** Complementarity of key:output\_2 complex. There are 10 complementary bases (pink) between output\_2 and key. The formation of key:output\_2 complexes prevents R2:output\_2 complexes from forming, leading to a decrease in fluorescence since less output\_2 reacts with R2. **d)** NUPACK generated structure of key:output\_2. Simulated in a solution of 300 nM key and 400 nM output\_2, key:output\_2 complexes form ~60% of the ensemble. The free energies were calculated using a reference concentration of 55.6M (water in water) since we use an aqueous solution at low concentrations of solute.

**Table S1.** DNA strand sequences.

| Strand Name        | Sequence                                                                                          | # of nt | Purification                                  |
|--------------------|---------------------------------------------------------------------------------------------------|---------|-----------------------------------------------|
| Output_1           | \5FAM\TGAAGTTTGGTGGTG AGATG                                                                       | 20      | Standard desalting                            |
| R1'                | CACCACCAAACCTCA\3IABkFQ\                                                                          | 15      | HPLC (High Performance Liquid Chromatography) |
| Q1                 | /56FAM/TGAAGTTTGGTGGTGAGATG                                                                       | 20      | Standard desalting                            |
| Q2                 | CACCACCAAACCTCA/3IABkFQ/                                                                          | 15      | HPLC                                          |
| Alpha ( $\alpha$ ) | GTGTAAGTA GGA GTGAGGTGAGG\3IABkFQ\                                                                | 23      | HPLC                                          |
| Q3                 | /5IABkFQ/CACCACCAAACCTCA                                                                          | 15      | HPLC                                          |
| Beta ( $\beta$ )   | \5FAM\CCTCACCTCACT CCT ACTTACAC TTTTTTTTTT                                                        | 33      | Standard desalting                            |
| Gamma ( $\gamma$ ) | \5Cy3\CCTCACCTCACTACTTACAC                                                                        | 20      | HPLC                                          |
| Foundation (F)     | AAGTTTGGTGGTG AGATG AAGTTTGGTGGTG AGATG<br>AAGTTTGGTGGTG AGATG AAGTTTGGTGGTG<br>AGATGGTAGGATGGAGT | 85      | Standard desalting                            |
| Output_2           | CATCTCACCACCAAACCTT                                                                               | 18      | Standard desalting                            |
| Lock               | TACTC ACTCCATCCTACC                                                                               | 18      | Standard desalting                            |
| Key                | GGTAGGATGGAGT GAGTA                                                                               | 18      | Standard desalting                            |
| R2                 | /5cy3/TGAAGTTTGGTGGTG<br>/i2MOErA/i2MOErG//i2MOErA/i2MOErT//i2MOErG/                              | 15      | HPLC                                          |
| R2'                | CACCACCAAACCTCA/3IABkFQ/                                                                          | 15      | HPLC                                          |

<sup>1</sup>Purified strands have attached fluorophores or quenchers.

<sup>2</sup>Complementary strands are denoted by an apostrophe for reporter complexes or by matching colors.

<sup>3</sup>All strands are listed from 5' to 3' direction.

**Table S2.** Experimental details of SI Figure 1.

| Sample (Concentration)  | Amount Added ( $\mu$ L) |                  |                                              |     |     |     |     |     |
|-------------------------|-------------------------|------------------|----------------------------------------------|-----|-----|-----|-----|-----|
|                         | Positive Control        | Negative Control | Test Wells (Varied Rep-X thaw times in mins) |     |     |     |     |     |
|                         |                         |                  | 5                                            | 10  | 30  | 60  | 90  | 120 |
| R1:output_1 (1 $\mu$ M) |                         | 2.5              | 2.5                                          | 2.5 | 2.5 | 2.5 | 2.5 | 2.5 |
| Q1 (1 $\mu$ M)          | 2.5                     |                  |                                              |     |     |     |     |     |
| Q2 (1 $\mu$ M)          | 2.5                     |                  |                                              |     |     |     |     |     |
| Rep-X (1 $\mu$ M)       |                         |                  | 2.5                                          | 2.5 | 2.5 | 2.5 | 2.5 | 2.5 |
| ATP (10 mM)             | 2.5                     | 2.5              | 2.5                                          | 2.5 | 2.5 | 2.5 | 2.5 | 2.5 |
| Helicase Buffer (10x)   | 2.5                     | 2.5              | 2.5                                          | 2.5 | 2.5 | 2.5 | 2.5 | 2.5 |
| Water                   | 15                      | 17.5             | 15                                           | 15  | 15  | 15  | 15  | 15  |

**Table S3.** Experimental details of Figure 1c.

| Sample<br>(Concentration)      | Amount Added ( $\mu\text{L}$ ) |                     |                                       |        |      |      |      |
|--------------------------------|--------------------------------|---------------------|---------------------------------------|--------|------|------|------|
|                                | Positive<br>Control            | Negative<br>Control | Test Wells (Varied ATP Concentration) |        |      |      |      |
|                                |                                |                     | 0.1 mM                                | 0.2 mM | 1 mM | 2 mM | 5 mM |
| R1:output_1 (1 $\mu\text{M}$ ) |                                | 2.5                 | 2.5                                   | 2.5    | 2.5  | 2.5  | 2.5  |
| Q1 (1 $\mu\text{M}$ )          | 2.5                            |                     |                                       |        |      |      |      |
| Q2 (1 $\mu\text{M}$ )          | 2.5                            |                     |                                       |        |      |      |      |
| Rep-X (1 $\mu\text{M}$ )       |                                |                     | 2.5                                   | 2.5    | 2.5  | 2.5  | 2.5  |
| ATP (5 mM)                     |                                |                     | 0.5                                   | 1      |      |      |      |
| ATP (10 mM)                    | 2.5                            | 2.5                 |                                       |        | 2.5  | 5    |      |
| ATP (50 mM)                    |                                |                     |                                       |        |      |      | 2.5  |
| Helicase Buffer (10x)          | 2.5                            | 2.5                 | 2.5                                   | 2.5    | 2.5  | 2.5  | 2.5  |
| Water                          | 15                             | 17.5                | 17                                    | 16.5   | 15   | 12.5 | 15   |

**Table S4.** Experimental details of Figure 1d.

| Sample<br>(Concentration)                  | Amount Added ( $\mu\text{L}$ ) |          |                           |                             |
|--------------------------------------------|--------------------------------|----------|---------------------------|-----------------------------|
|                                            | Controls                       |          | Test Wells (1 mM ATP)     |                             |
|                                            | Positive                       | Negative | No regenerative<br>system | With regenerative<br>system |
| R1:output_1 (1 $\mu\text{M}$ )             |                                | 2.5      | 2.5                       | 2.5                         |
| Q1 (1 $\mu\text{M}$ )                      | 2.5                            |          |                           |                             |
| Q2 (1 $\mu\text{M}$ )                      | 2.5                            |          |                           |                             |
| Rep-X (1 $\mu\text{M}$ )                   |                                |          | 2.5                       | 2.5                         |
| ATP (10 mM)                                | 2.5                            | 2.5      | 2.5                       |                             |
| ATP with regeneration<br>machinery (10 mM) |                                |          |                           | 2.5                         |
| Helicase Buffer (10x)                      | 2.5                            | 2.5      | 2.5                       | 2.5                         |
| Water                                      | 15                             | 17.5     | 15                        | 15                          |

**Table S5.** Experimental details of Figure 2c, 2d.

| Sample (Concentration)                     | Amount Added ( $\mu\text{L}$ ) |                  |                  |                  |                        |                          |
|--------------------------------------------|--------------------------------|------------------|------------------|------------------|------------------------|--------------------------|
|                                            | 5-FAM                          |                  | 5-Cy3            |                  | Test Wells (1 mM ATP)  |                          |
|                                            | Positive Control               | Negative Control | Positive Control | Negative Control | No regenerative system | With regenerative system |
| $\alpha$ (1 $\mu\text{M}$ )                |                                |                  |                  |                  |                        |                          |
| $\beta$ (1 $\mu\text{M}$ )                 | 2.5                            |                  |                  |                  |                        |                          |
| $\gamma$ (1 $\mu\text{M}$ )                |                                |                  | 2.5              |                  |                        |                          |
| Q3 (1 $\mu\text{M}$ )                      | 2.5                            |                  | 2.5              |                  |                        |                          |
| $\alpha:\beta$ (1 $\mu\text{M}$ )          |                                | 2.5              |                  |                  |                        |                          |
| $\alpha:\gamma$ (1 $\mu\text{M}$ )         |                                |                  |                  | 2.5              |                        |                          |
| $\alpha:\beta + \gamma$ (1 $\mu\text{M}$ ) |                                |                  |                  |                  | 2.5                    | 2.5                      |
| Rep-X (1 $\mu\text{M}$ )                   |                                |                  |                  |                  | 2.5                    | 2.5                      |
| ATP (10 mM)                                | 2.5                            | 2.5              | 2.5              | 2.5              | 2.5                    |                          |
| ATP with regeneration machinery (10 mM)    |                                |                  |                  |                  |                        | 2.5                      |
| Helicase Buffer (10x)                      | 2.5                            | 2.5              | 2.5              | 2.5              | 2.5                    | 2.5                      |
| Water                                      | 15                             | 17.5             | 15               | 17.5             | 15                     | 15                       |

**Table S6.** Experimental details of SI Figure 2.

| Sample (Concentration)         | Amount Added ( $\mu\text{L}$ ) |          |                         |
|--------------------------------|--------------------------------|----------|-------------------------|
|                                | Controls                       |          | Test Wells (Duplicated) |
|                                | Positive                       | Negative |                         |
| R2:R2' (1 $\mu\text{M}$ )      | 2.5                            | 2.5      | 2.5                     |
| F:output_2n (1 $\mu\text{M}$ ) |                                | 2.5      | 2.5                     |
| Output_2 (1 $\mu\text{M}$ )    | 10                             |          |                         |
| Rep-X (1 $\mu\text{M}$ )       |                                |          | 2.5                     |
| ATP (10 mM)                    | 2.5                            | 2.5      | 2.5                     |
| Helicase Buffer (10x)          | 2.5                            | 2.5      | 2.5                     |
| Water                          | 7.5                            | 15       | 12.5                    |

**Table S7.** Experimental details of SI Figure 3a, 3b.

| Sample (Concentration)         | Amount Added ( $\mu\text{L}$ ) |          |                                                |      |      |      |      |      |      |     |
|--------------------------------|--------------------------------|----------|------------------------------------------------|------|------|------|------|------|------|-----|
|                                | Controls                       |          | Test Wells (Varied Output Concentration in nM) |      |      |      |      |      |      |     |
|                                | Positive                       | Negative | 25                                             | 50   | 75   | 100  | 125  | 150  | 175  | 200 |
| R2:R2' (1 $\mu\text{M}$ )      |                                | 2.5      | 2.5                                            | 2.5  | 2.5  | 2.5  | 2.5  | 2.5  | 2.5  | 2.5 |
| R2 (1 $\mu\text{M}$ )          | 2.5                            |          |                                                |      |      |      |      |      |      |     |
| F:output_2n (1 $\mu\text{M}$ ) |                                |          |                                                |      |      |      |      |      |      |     |
| Output_2 (500 nM)              |                                |          | 1.3                                            | 2.5  | 3.8  |      |      |      |      |     |
| Output_2 (1 $\mu\text{M}$ )    |                                |          |                                                |      |      | 2.5  | 3.1  | 3.8  | 4.4  | 5   |
| Rep-X (1 $\mu\text{M}$ )       |                                |          |                                                |      |      |      |      |      |      |     |
| Helicase Buffer (10x)          | 2.5                            | 2.5      | 2.5                                            | 2.5  | 2.5  | 2.5  | 2.5  | 2.5  | 2.5  | 2.5 |
| Water                          | 10                             | 20       | 18.8                                           | 17.5 | 16.3 | 17.5 | 16.9 | 16.3 | 15.6 | 15  |

\*Some numbers rounded.

**Table S8.** Experimental details of Figure 3e, 3f.

| Sample (Concentration)                  | Amount Added ( $\mu\text{L}$ )         |       |       |       |        |        |        |        |
|-----------------------------------------|----------------------------------------|-------|-------|-------|--------|--------|--------|--------|
|                                         | Test Wells (Varied Lock Concentration) |       |       |       |        |        |        |        |
|                                         | none                                   | 10 nM | 20 nM | 50 nM | 100 nM | 150 nM | 200 nM | 500 nM |
| R2:R2' (1 $\mu\text{M}$ )               | 2.5                                    | 2.5   | 2.5   | 2.5   | 2.5    | 2.5    | 2.5    | 2.5    |
| F:output_2n (1 $\mu\text{M}$ )          | 2.5                                    |       |       |       |        |        |        |        |
| Lock-10:F:output_2n (1 $\mu\text{M}$ )  |                                        | 2.5   |       |       |        |        |        |        |
| Lock-20:F:output_2n (1 $\mu\text{M}$ )  |                                        |       | 2.5   |       |        |        |        |        |
| Lock-50:F:output_2n (1 $\mu\text{M}$ )  |                                        |       |       | 2.5   |        |        |        |        |
| Lock-100:F:output_2n (1 $\mu\text{M}$ ) |                                        |       |       |       | 2.5    |        |        |        |
| Lock-150:F:output_2n (1 $\mu\text{M}$ ) |                                        |       |       |       |        | 2.5    |        |        |
| Lock-200:F:output_2n (1 $\mu\text{M}$ ) |                                        |       |       |       |        |        | 2.5    |        |
| Lock-500:F:output_2n (1 $\mu\text{M}$ ) |                                        |       |       |       |        |        |        | 2.5    |
| Rep-X (1 $\mu\text{M}$ )                | 2.5                                    | 2.5   | 2.5   | 2.5   | 2.5    | 2.5    | 2.5    | 2.5    |
| ATP (10 mM)                             | 2.5                                    | 2.5   | 2.5   | 2.5   | 2.5    | 2.5    | 2.5    | 2.5    |
| Helicase Buffer (10x)                   | 2.5                                    | 2.5   | 2.5   | 2.5   | 2.5    | 2.5    | 2.5    | 2.5    |
| Water                                   | 12.5                                   | 12.5  | 12.5  | 12.5  | 12.5   | 12.5   | 12.5   | 12.5   |

\*Same controls as Table 5.

\*Lock-10:F:output\_2 indicates 100 nM of lock was annealed to the F:output\_2n complex.

**Table S9.** Experimental details of Figure 3g, 3h and SI Figure 3c, 3d.

| Sample (Concentration)                  | Amount Added ( $\mu\text{L}$ )        |       |       |        |        |        |                   |
|-----------------------------------------|---------------------------------------|-------|-------|--------|--------|--------|-------------------|
|                                         | Test Wells (Varied Key Concentration) |       |       |        |        |        |                   |
|                                         | none                                  | 15 nM | 75 nM | 150 nM | 300 nM | 750 nM | 1.5 $\mu\text{M}$ |
| R2:R2' (1 $\mu\text{M}$ )               |                                       | 2.5   | 2.5   | 2.5    | 2.5    | 2.5    | 2.5               |
| Lock-150:F:output_2n (1 $\mu\text{M}$ ) | 2.5                                   | 2.5   | 2.5   | 2.5    | 2.5    | 2.5    | 2.5               |
| Key (1 $\mu\text{M}$ )                  |                                       | 0.4   | 1.9   | 3.8    | 7.5    |        |                   |
| Key (10 $\mu\text{M}$ )                 |                                       |       |       |        |        | 1.9    | 3.8               |
| Rep-X (1 $\mu\text{M}$ )                | 2.5                                   | 2.5   | 2.5   | 2.5    | 2.5    | 2.5    | 2.5               |
| ATP (10 mM)                             | 2.5                                   | 2.5   | 2.5   | 2.5    | 2.5    | 2.5    | 2.5               |
| Helicase Buffer (10x)                   | 2.5                                   | 2.5   | 2.5   | 2.5    | 2.5    | 2.5    | 2.5               |
| Water                                   | 12.5                                  | 12.1  | 10.6  | 8.8    | 5      | 10.6   | 8.8               |

\*Same controls as Table 5.

\*Some numbers rounded.
